# Supplementary material
Source: MDPI journal article supplement (https://www.mdpi.com/2073-4441/15/1/15)

# Supplementary Material to ‘Stable isotope assessment of nitrogen pollution underscores the importance of tidal flushing on nutrient dynamics in a New Jersey (USA) estuary’

Johannes R. Krause, Michelle E. Gannon, Autumn J. Oczkowski, Morgan J. Schwartz, Lena K. Champlin, David Steinmann, Martha Maxwell-Doyle, Emily Pirl, Victoria Allen and Elizabeth Burke Watson

## Supplementary tables

**Table S1.** Citations for historic maps and imagery used to develop the qualitative depiction of tidal flushing in Figure 1.

| year | Number of inlets | Citation                                                                                                                                                                                                                                                                                                            |
|------|------------------|---------------------------------------------------------------------------------------------------------------------------------------------------------------------------------------------------------------------------------------------------------------------------------------------------------------------|
| 1797 | 6                | Sotzmann, D. F. (1797). VIII. New Jersey [map].1:500,000, Ebelings Erdbeschreibung und Geschichte von Amerika. Hamburg, Germany: Bey Carl Ernst Bohn. <a href="https://mapmaker.rutgers.edu/NJ_1797_Sotzmann.jpg">https://mapmaker.rutgers.edu/NJ_1797_Sotzmann.jpg</a>                                             |
| 1812 | 6                | Lewis, S. (1812) New Jersey. Drawn by S. Lewis. Tanner sc. 1:200,000, Boston: Published by Thomas & Andrews. <a href="https://mapmaker.rutgers.edu/NJ_1812_Lewis.jpg">https://mapmaker.rutgers.edu/NJ_1812_Lewis.jpg</a>                                                                                            |
| 1834 | 6                | Finley, A. 1834. New Jersey. In <i>A New General Atlas, Comprising a Complete Set of Maps, representing the Grand Divisions of the Globe, Together with the several Empires, Kingdoms and States in the World; Compiled from the Best Authorities, and corrected by the Most Recent Discoveries</i> , Philadelphia. |
| 1860 | 4                | Hopkins, G.M. New York with the vicinities of New York and Philadelphia. 1:158,400. State Geological Survey and US Coast Survey.                                                                                                                                                                                    |
| 1878 | 3                | Colton’s New Jersey. 1878. 1:475,200.GW. and C.B. Colton & Co., New York                                                                                                                                                                                                                                            |
| 1889 | 3                | Cook, G.H. 1889. Geological Map of New Jersey from original surveys. 1”=5 miles. Geological Survey of New Jersey.                                                                                                                                                                                                   |
| 1906 | 3                | Vermeule, C.C. 1906. Geological Survey of New Jersey. 1”=5 miles.                                                                                                                                                                                                                                                   |
| 1918 | 3                | Vermeule, C.C. 1918. Road Map of New Jersey. State of New Jersey, Department of Conservation and Development.1”=4 miles.                                                                                                                                                                                            |
| 1928 | 4                | Cape May to Matasquan River. State of New Jersey, Board of Commerce                                                                                                                                                                                                                                                 |

and Navigation, 1:80,000

|      |   |                                                                                                                                                      |
|------|---|------------------------------------------------------------------------------------------------------------------------------------------------------|
| 1940 | 4 | New Jersey, Minor Civil Divisions and Townships. 1940. Bureau of the Census.                                                                         |
| 1954 | 3 | Land Type Areas of New Jersey. 1954. 1"=4 miles. New Jersey Agricultural Experiment Station, Rutgers University, The State University of New Jersey. |
| 1984 | 3 | Google Earth Pro 7.3.4.8642 (Dec 1984). Barnget Bay-Little Egg Harbor-Great Bay Estuary.                                                             |
| 2020 | 3 | Google Earth Pro 7.3.4.8642 (Dec 2020). Barnget Bay-Little Egg Harbor-Great Bay Estuary.                                                             |

**Table S2.** Samples collected from Barnegat Bay and analyzed for stable carbon and nitrogen isotopes. *Spartina alterniflora* = SA; *Spartina patens* = SP; *Phragmites australis* = PA; *Zostera marina* = ZM; *Ruppia maritima* = RM; *Ulva* spp. = UL; *Callinectes sapidus* = CS; *Geukensia demissa* = GD; *Ilyanassa obsoleta* = TO; *Fundulus* spp. = FUN. Water column suspended matter (SM) was also analyzed. Sample size (n) is denoted within each column.

| Site ID | Latitude | Longitude | Date         | Zone | Soil | SA | SP | PA | ZM | RM | UL | CS | GD | TO | FUN | SM | U |
|---------|----------|-----------|--------------|------|------|----|----|----|----|----|----|----|----|----|-----|----|---|
| 1       | 40.0348  | -74.0673  | 12 Aug 2020  | 1    | 5    | 3  | 1  |    |    |    |    | 5  | 4  |    | 2   | 1  | 5 |
| 2       | 39.8641  | -74.1394  | 23 July 2020 | 2    | 5    | 3  | 3  | 3  |    |    |    | 4  | 4  |    |     | 1  | 3 |
| 3       | 39.7738  | -74.1003  | 15 July 2020 | 2    | 5    | 1  |    | 1  |    |    | 1  | 4  | 3  | 5  | 4   | 1  | 5 |
| 4       | 39.7653  | -74.1365  | 15 July 2020 | 2    | 5    | 2  | 2  | 3  | 3  | 3  | 3  | X  | 5  | 5  | 5   | 1  | 5 |
| 5       | 39.8139  | -74.1684  | 11 Aug 2020  | 2    | 5    | 2  |    | 2  |    |    | 3  | 3  | X  |    | 5   | 1  | 5 |
| 6       | 39.8340  | -74.1548  | 11 Aug 2020  | 2    | 5    | 3  |    |    |    |    |    | 5  | 2  | 5  | 4   | 1  | 4 |
| 7       | 39.9714  | -74.1187  | 22 July 2020 | 1    | 5    | 3  | 3  | 3  |    |    |    | 3  |    |    | 5   | 1  |   |
| 8       | 39.5327  | -74.3009  | 7 July 2020  | 4    | 5    | 3  | 3  |    |    | 3  |    | 5  |    |    | 5   | 1  | 5 |
| 9       | 39.5461  | -74.2775  | 7 July 2020  | 4    | 5    | 3  |    | 3  |    | 3  | 3  | X  | 5  | 4  | 5   | 1  |   |
| 10      | 39.6065  | -74.3076  | 8 July 2020  | 3    | 5    | 3  |    |    |    |    |    | 2  | 5  | 5  | 5   | 1  |   |
| 11      | 39.6121  | -74.2687  | 8 July 2020  | 3    | 5    | 1  | 2  | 1  |    |    | 2  | X  | 5  |    | 5   | 1  | 5 |
| 12      | 39.6249  | -74.2767  | 8 July 2020  | 3    | 5    | 3  | 3  | 3  |    | 1  |    | 1  | 1  |    | 5   | 1  | 5 |
| 13      | 39.6417  | -74.2558  | 9 July 2020  | 3    | 5    | 3  | 3  | 4  |    |    |    | 1  | 5  | 4  | 5   | 1  | 5 |
| 14      | 39.6531  | -74.2423  | 9 July 2020  | 3    | 5    | 3  | 3  |    |    | 3  |    | 2  | 5  |    | 4   | 1  | 5 |
| 15      | 39.6789  | -74.1969  | 13 July 2020 | 2    | 5    | 2  | 3  | 2  |    |    |    | 4  | 5  | 4  | 5   | 1  | 5 |
| 16      | 39.7075  | -74.1877  | 14 July 2020 | 2    | 5    | 2  | 2  |    |    |    |    | 5  | 5  | 5  | 4   | 1  | 5 |
| 17      | 39.7222  | -74.1705  | 14 July 2020 | 2    | 5    | 3  |    |    |    |    |    | 4  | 3  | 5  | 5   | 1  | 5 |
| 18      | 39.7286  | -74.2108  | 18 Aug 2020  | 2    | 5    | 3  | 3  | 2  |    | 3  |    | 3  | 5  |    | 4   | 1  |   |
| 19      | 39.7421  | -74.1981  | 14 July 2020 | 2    | 5    | 3  | 1  |    |    |    |    | 3  | 5  | 4  | 4   | 1  | 5 |
| 20      | 39.7430  | -74.1294  | 15 July 2020 | 2    | 5    | 3  | 2  |    | 2  | 2  | 3  | 3  | 4  | 5  | 4   | 1  | 2 |
| 21*     | 39.5640  | -74.4190  | 3 June 2020  | 3    | 5    | 3  | 3  |    |    |    | 3  | 1  | 5  |    | 5   | 1  | 5 |
| 22*     | 39.5153  | -74.3295  | 7 July 2020  | 4    | 5    | 3  | 3  |    |    | 3  | 2  | 2  | 5  |    | 5   | 1  | 5 |
| 23*     | 39.4960  | -74.4000  | 11 July 2020 | 4    | 5    | 3  | 3  |    |    |    | 3  | 5  | 5  | 5  | 5   | 1  | 5 |
| 24*     | 39.4847  | -74.3472  | 1 July 2020  | 4    | 5    | 2  | 3  |    |    |    | X  | X  | 4  | 5  | 5   | 1  | 5 |
| 25*     | 39.5217  | -74.4306  | 30 June 2020 | 4    | 5    | 3  | 3  | 3  |    |    |    | 3  | 5  | 3  | 5   | 1  | 5 |
| 26      | 39.5497  | -74.3498  | 3 July 2019  | 4    | 5    | 3  | 3  | 3  |    | 3  | 3  | X  | 25 | 25 | 5   | 1  | 5 |
| 27      | 39.5623  | -74.2916  | 3 July 2019  | 4    | 5    | 3  | 3  | 3  |    | 3  | 3  | X  | 25 | 25 | 5   | 1  | 5 |
| 28      | 39.7871  | -74.1169  | 30 July 2019 | 2    | 5    | 3  |    |    | 3  |    | 3  | X  | 25 | 25 | 5   | 1  | 5 |
| 29      | 39.8116  | -74.0962  | 2 July 2019  | 2    | 5    | 3  | 3  | 3  | 3  |    | 3  | X  | 25 | 25 | 5   | 1  |   |
| 30      | 39.8477  | -74.1436  | 31 July 2019 | 2    | 5    | 3  | 3  | 3  |    |    | 3  | X  | 25 | 25 | 5   | 1  | 5 |
| 31      | 39.8900  | -74.1377  | 17 July 2019 | 1    | 5    | 3  | 3  | 3  |    |    | 3  | X  | 25 |    | 5   | 1  | 5 |
| 32      | 39.9207  | -74.1172  | 16 July 2019 | 1    | 5    | 3  | 3  | 3  |    | 3  | 3  | X  | 25 |    | 5   | 1  | 5 |
| 33      | 39.9898  | -74.1162  | 19 June 2019 | 1    | 5    | 3  |    |    |    |    | 3  | X  |    |    | 5   | 1  |   |
| 34      | 39.9960  | -74.0754  | 4 July 2019  | 1    | 5    | 3  | 3  | 3  |    | 3  |    | X  |    |    | 5   | 1  | 5 |
| 35      | 40.0580  | -74.1250  | 2 July 2019  | 1    | 5    | 3  | 3  | 3  |    |    |    | X  |    |    | 5   | 1  | 5 |

**Table S3.** Citations for images used in Figure 2.

| <b>Species</b>               | <b>Citation</b>                                                                                                                                                                                                                                                       |
|------------------------------|-----------------------------------------------------------------------------------------------------------------------------------------------------------------------------------------------------------------------------------------------------------------------|
| <i>Spartina alterniflora</i> | Tracey Saxby, Integration and Application Network<br><a href="https://ian.umces.edu/media-library/spartina-spp-salt-marsh-grass/">https://ian.umces.edu/media-library/spartina-spp-salt-marsh-grass/</a>                                                              |
| <i>Spartina patens</i>       | Tracey Saxby, Integration and Application Network<br><a href="https://ian.umces.edu/media-library/spartina-patens-saltmeadow-cordgrass/">https://ian.umces.edu/media-library/spartina-patens-saltmeadow-cordgrass/</a>                                                |
| <i>Phragmites australis</i>  | Tracey Saxby, Integration and Application Network<br><a href="https://ian.umces.edu/media-library/phragmites-australis-common-reed-singular/">https://ian.umces.edu/media-library/phragmites-australis-common-reed-singular/</a>                                      |
| <i>Ulva</i> spp.             | Tracey Saxby, Integration and Application Network<br><a href="https://ian.umces.edu/media-library/ulva-spp-sea-lettuce/">https://ian.umces.edu/media-library/ulva-spp-sea-lettuce/</a>                                                                                |
| <i>Zostera marina</i>        | Diana Kleine, Marine Botany UQ<br><a href="https://ian.umces.edu/media-library/zostera-capricornii/">https://ian.umces.edu/media-library/zostera-capricornii/</a>                                                                                                     |
| <i>Ruppia maritima</i>       | Jane Thomas, Integration and Application Network<br><a href="https://ian.umces.edu/media-library/ruppia-maritima-vegetative-shoots/">https://ian.umces.edu/media-library/ruppia-maritima-vegetative-shoots/</a>                                                       |
| <i>Fundulus</i> spp          | Tracey Saxby, Integration and Application Network<br><a href="https://ian.umces.edu/media-library/fundulus-heteroclitus-mummichog-female/">https://ian.umces.edu/media-library/fundulus-heteroclitus-mummichog-female/</a>                                            |
| <i>Callinectes sapidus</i>   | Jane Thomas, Integration and Application Network<br><a href="https://ian.umces.edu/media-library/callinectes-sapidus-blue-crab-ventral-view-adolescent-female/">https://ian.umces.edu/media-library/callinectes-sapidus-blue-crab-ventral-view-adolescent-female/</a> |
| <i>Ilyanassa obsoleta</i>    | Kim Kraeer, Lucy Van Essen-Fishman<br><a href="https://ian.umces.edu/media-library/littoraria-spp-mangrove-periwinkle/">https://ian.umces.edu/media-library/littoraria-spp-mangrove-periwinkle/</a>                                                                   |
| <i>Geukensia demissa</i>     | Dieter Tracey, Department of Water Western Australia<br><a href="https://ian.umces.edu/media-library/mussels-2/">https://ian.umces.edu/media-library/mussels-2/</a>                                                                                                   |
| <i>Uca</i> spp.              | Kim Kraeer, Lucy Van Essen-Fishman<br><a href="https://ian.umces.edu/media-library/uca-annulipes-mangrove-fiddler-crab/">https://ian.umces.edu/media-library/uca-annulipes-mangrove-fiddler-crab/</a>                                                                 |

**Table S4.** Historic and paired modern samples analyzed for carbon and nitrogen stable isotopes. Museums are abbreviated American Museum of Natural History (AMNH), the Delaware Museum of Natural History (DMNH), the New York Botanical Garden (NYBG), the Cleveland Museum of Natural History (CMNH), and the Academy of Natural Sciences of Philadelphia (ANSP).

| Museum | Catalog # | Year | Species                      | <i>n</i> | Location          | $\delta^{15}\text{N} + \text{sd}$ | $\delta^{13}\text{C} + \text{sd}$ | Zone |
|--------|-----------|------|------------------------------|----------|-------------------|-----------------------------------|-----------------------------------|------|
| NYBG   | 01816587  | 1934 | <i>Spartina patens</i>       | 2        | Bay Head          | $4.6 \pm 0.7$                     | $-11.8 \pm 0.1$                   | 1    |
| NYBG   | 01816802  | 1915 | <i>Spartina patens</i>       | 2        | Point Pleasant    | $6.7 \pm 0.1$                     | $-11.0 \pm 0.3$                   | 1    |
| NYBG   | 01764718  | 1895 | <i>Phragmites australis</i>  | 2        | Bay Head          | $6.0 \pm 0.2$                     | -24.6                             | 1    |
| modern |           | 2020 | <i>Phragmites australis</i>  | 5        |                   | $5.4 \pm 1.0$                     | $-25.9 \pm 0.4$                   | 1    |
| modern |           | 2020 | <i>Spartina patens</i>       | 6        |                   | $4.2 \pm 0.8$                     | $-13.7 \pm 0.4$                   | 1    |
| NYBG   | 01786908  | 1950 | <i>Spartina alterniflora</i> | 3        | Forked River      | $3.9 \pm 0.2$                     | $-10.5 \pm 0.1$                   | 2    |
| NYBG   | 01764717  | 1946 | <i>Phragmites australis</i>  | 2        | Harvey Cedars     | $3.1 \pm 0.2$                     | $-23.6 \pm 0.1$                   | 2    |
| NYBG   | 01764753  | 1937 | <i>Phragmites australis</i>  | 2        | Waretown          | $6.2 \pm 0.1$                     | $-25.4 \pm 0.2$                   | 2    |
| AMNH   | 100680    | 1962 | <i>Modiolus demissus</i>     | 1        | Barnegat Light    | 14.8                              |                                   | 2    |
| AMNH   | 100692    | 1962 | <i>Ilyanassa obsoleta</i>    | 5        | Harvey Cedars     | $8.6 \pm 0.9$                     |                                   | 2    |
| AMNH   | 172622    | 1963 | <i>Spisulua solidissima</i>  | 1        | Barnegat Light    | 10.9                              |                                   | 2    |
| AMNH   | 293587    | 1965 | <i>Spisulua solidissima</i>  | 1        | Lavalette         | 17.2                              |                                   | 2    |
| modern |           | 2020 | <i>Spartina patens</i>       | 9        | Barnegat Inlet    | $5.6 \pm 3.4$                     | $-14.3 \pm 1.1$                   | 2    |
| modern |           | 2020 | <i>Phragmites australis</i>  | 9        | Barnegat Inlet    | $7.7 \pm 2.2$                     | $-25.4 \pm 0.6$                   | 2    |
| modern |           | 2020 | <i>Spartina alterniflora</i> | 14       | Barnegat Inlet    | $5.8 \pm 2.3$                     | $-13.5 \pm 1.1$                   | 2    |
| modern |           | 2020 | <i>Geukensia demissa</i>     | 13       | Barnegat Inlet    | $7.6 \pm 1.0$                     | $-20.9 \pm 1.9$                   | 2    |
| modern |           | 2020 | <i>Ilyanassa obsoleta</i>    | 11       | Barnegat Inlet    | $7.9 \pm 1.1$                     | $-14.8 \pm 1.1$                   | 2    |
| CMNH   | 241229    | 1940 | <i>Spartina patens</i>       | 2        | Beach Haven       | $4.8 \pm 0.4$                     | $-11.5 \pm 0.2$                   | 3    |
| DMNH   | 67639     | 1943 | <i>Ilyanassa obsoleta</i>    | 2        | Beach Haven       | 13.8                              |                                   | 3    |
| DMNH   | 37748     | 1957 | <i>Mytilus edulis</i>        | 2        | Beach Haven       | $14.0 \pm 1.3$                    |                                   | 3    |
| DMNH   | 102767    | 1961 | <i>Crassostrea virginica</i> | 1        | Beach Haven       | 13.3                              |                                   | 3    |
| DMNH   | 38345     | 1970 | <i>Mya arenaria</i>          | 1        | Beach Haven       | 12.4                              |                                   | 3    |
| DMNH   | 110611    | 1975 | <i>Ilyanassa obsoleta</i>    | 4        | Beach Haven       | $12.9 \pm 0.5$                    |                                   | 3    |
| modern |           | 2020 | <i>Spartina patens</i>       | 5        | Little Egg Harbor | $2.7 \pm 0.8$                     | $-14.1 \pm 0.2$                   | 3    |
| modern |           | 2020 | <i>Ilyanassa obsoleta</i>    | 3        | Little Egg Harbor | $7.1 \pm 0.4$                     | $-15.2 \pm 1.3$                   | 3    |
| ANSP   | 16491     | 1880 | <i>Ilyanassa obsoleta</i>    | 2        | Egg Harbor        | $11.9 \pm 1.4$                    |                                   | 3    |
| ANSP   | 159286    | 1932 | <i>Ilyanassa obsoleta</i>    | 1        | Egg Harbor        | 14.7                              |                                   | 4    |
| ANSP   | 262992    | 1954 | <i>Ilyanassa obsoleta</i>    | 1        | Egg Harbor        | 13.8                              |                                   | 4    |
| modern |           | 2020 | <i>Ilyanassa obsoleta</i>    | 5        | Great Bay         | $9.1 \pm 1.5$                     | $-14.8 \pm 1.5$                   | 4    |
| NYBG   | 01816713  | 1890 | <i>Spartina patens</i>       | 2        |                   | $2.0 \pm 1.3$                     | -11.0                             | 4    |

**Table S5:** Results of tests for difference of mean  $\delta^{15}\text{N}$  and  $\delta^{13}\text{C}$  between regions. P-values are reported for ANOVA, Kruskal-Wallis, Tukey's and Dunn's test results (significant results in bold). Effect sizes are reported as F-statistics (ANOVA) or  $\eta^2$  (Kruskal-Wallis).

|                       | Variable               | Test           | <i>p</i>     | Effect size | Post-hoc test for differences between regions |             |              |              |             |             |
|-----------------------|------------------------|----------------|--------------|-------------|-----------------------------------------------|-------------|--------------|--------------|-------------|-------------|
|                       |                        |                |              |             | 1 vs 2                                        | 1 vs 3      | 1 vs 4       | 2 vs 3       | 2 vs 4      | 3 vs 4      |
| $\delta^{15}\text{N}$ | SPM                    | ANOVA          | <b>0.008</b> | 4.68        | 0.12                                          | 0.97        | <b>0.05</b>  | <b>0.05</b>  | 0.92        | <b>0.03</b> |
|                       | Soil                   | Kruskal-Wallis | 0.19         | 0.06        |                                               |             |              |              |             |             |
|                       | <i>S. alterniflora</i> | ANOVA          | <b>0.03</b>  | 3.26        | <b>0.03</b>                                   | 0.87        | 0.21         | 0.26         | 0.91        | 0.67        |
|                       | <i>S. patens</i>       | Kruskal-Wallis | 0.1          | 0.11        |                                               |             |              |              |             |             |
|                       | <i>P. australis</i>    | ANOVA          | <b>0.04</b>  | 3.36        | 0.61                                          | 0.98        | <b>0.03</b>  | 0.89         | 0.16        | 0.09        |
|                       | <i>Ulva</i>            | ANOVA          | 0.51         | 0.71        |                                               |             |              |              |             |             |
|                       | <i>C. sapidus</i>      | ANOVA          | <b>0.003</b> | 5.76        | 0.08                                          | 0.46        | 0.71         | <b>0.003</b> | 0.65        | 0.09        |
|                       | <i>Fundulus</i>        | Kruskal-Wallis | <b>0.02</b>  | 0.2         | <b>0.03</b>                                   | 1           | 0.25         | 0.09         | 1           | 0.46        |
|                       | <i>G. demissa</i>      | ANOVA          | <b>0.04</b>  | 3.13        | 0.72                                          | 0.96        | 0.29         | 0.19         | 0.61        | 0.04        |
|                       | <i>I. obsoleta</i>     | ANOVA          | 0.05         | 3.02        |                                               |             |              |              |             |             |
|                       | <i>Uca</i>             | ANOVA          | 0.21         | 1.23        |                                               |             |              |              |             |             |
| $\delta^{13}\text{C}$ | SPM                    | ANOVA          | <b>0.001</b> | 7.34        | 0.22                                          | <b>0.02</b> | <b>0.007</b> | 0.35         | <b>0.02</b> | 0.77        |
|                       | Soil                   | Kruskal-Wallis | <b>0.006</b> | 0.31        | 1.0                                           | 0.07        | <b>0.01</b>  | 0.55         | 0.12        | 1.0         |
|                       | <i>S. alterniflora</i> | Kruskal-Wallis | 0.64         | 0.56        |                                               |             |              |              |             |             |
|                       | <i>S. patens</i>       | Kruskal-Wallis | 0.28         | 0.03        |                                               |             |              |              |             |             |
|                       | <i>P. australis</i>    | ANOVA          | 0.33         | 1.25        |                                               |             |              |              |             |             |
|                       | <i>Ulva</i>            | ANOVA          | 0.32         | 1.3         |                                               |             |              |              |             |             |
|                       | <i>C. sapidus</i>      | Kruskal-Wallis | 0.33         | 0.01        |                                               |             |              |              |             |             |
|                       | <i>Fundulus</i>        | ANOVA          | <b>0.03</b>  | 3.49        | 0.28                                          | 0.21        | <b>0.02</b>  | 0.71         | 0.15        | 0.83        |
|                       | <i>G. demissa</i>      | ANOVA          | <b>0.05</b>  | 2.96        | 0.59                                          | <b>0.03</b> | 0.23         | 0.29         | 0.98        | 0.57        |

|                       |                        | Post-hoc test for differences between regions |              |             |             |        |             |              |        |             |
|-----------------------|------------------------|-----------------------------------------------|--------------|-------------|-------------|--------|-------------|--------------|--------|-------------|
|                       | Variable               | Test                                          | <i>p</i>     | Effect size | 1 vs 2      | 1 vs 3 | 1 vs 4      | 2 vs 3       | 2 vs 4 | 3 vs 4      |
| $\delta^{15}\text{N}$ | SPM                    | ANOVA                                         | <b>0.008</b> | 4.68        | 0.12        | 0.97   | <b>0.05</b> | <b>0.05</b>  | 0.92   | <b>0.03</b> |
|                       | Soil                   | Kruskal-Wallis                                | 0.19         | 0.06        |             |        |             |              |        |             |
|                       | <i>S. alterniflora</i> | ANOVA                                         | <b>0.03</b>  | 3.26        | <b>0.03</b> | 0.87   | 0.21        | 0.26         | 0.91   | 0.67        |
|                       | <i>S. patens</i>       | Kruskal-Wallis                                | 0.1          | 0.11        |             |        |             |              |        |             |
|                       | <i>P. australis</i>    | ANOVA                                         | <b>0.04</b>  | 3.36        | 0.61        | 0.98   | <b>0.03</b> | 0.89         | 0.16   | 0.09        |
|                       | <i>Ulva</i>            | ANOVA                                         | 0.51         | 0.71        |             |        |             |              |        |             |
|                       | <i>C. sapidus</i>      | ANOVA                                         | <b>0.003</b> | 5.76        | 0.08        | 0.46   | 0.71        | <b>0.003</b> | 0.65   | 0.09        |
|                       | <i>Fundulus</i>        | Kruskal-Wallis                                | <b>0.02</b>  | 0.2         | <b>0.03</b> | 1      | 0.25        | 0.09         | 1      | 0.46        |
|                       | <i>G. demissa</i>      | ANOVA                                         | <b>0.04</b>  | 3.13        | 0.72        | 0.96   | 0.29        | 0.19         | 0.61   | 0.04        |
|                       | <i>I. obsoleta</i>     | ANOVA                                         | 0.05         | 3.02        |             |        |             |              |        |             |
|                       | <i>Uca</i>             | ANOVA                                         | 0.21         | 1.23        |             |        |             |              |        |             |
|                       | <i>I. obsoleta</i>     | ANOVA                                         | 0.89         | 0.11        |             |        |             |              |        |             |
|                       | <i>Uca</i>             | ANOVA                                         | 0.18         | 1.87        |             |        |             |              |        |             |

**Table S6.** Salt marsh soil core profiles, annotated by horizon. Total C, N, and %OC were determined and C:N ratios (by weight and molar) as well as carbon stocks were computed.

| Site         | Horizon | Top<br>cm | Bot<br>cm | Total<br>C | Total<br>N | OC<br>% | OD carbon |       |       |                   |        |        |
|--------------|---------|-----------|-----------|------------|------------|---------|-----------|-------|-------|-------------------|--------|--------|
|              |         |           |           |            |            |         | C/N       | Db,   | Pool, | carbon            | carbon | carbon |
|              |         |           |           |            |            |         | C/N       | molar | g/cc  | kg/m <sup>2</sup> | 100cm  | 200cm  |
| Bestpitch    | Oe      | 0         | 17        | 16.68      | 0.78       | 16.7    | 21        | 25    | 0.25  | 7.10              | 7.10   | 7.10   |
|              | Oi      | 17        | 26        | 20.37      | 0.86       | 20.4    | 24        | 28    | 0.19  | 3.49              | 3.49   | 3.49   |
|              | Oese1   | 26        | 54        | 11.56      | 0.69       | 11.6    | 17        | 20    | 0.61  | 19.81             | 19.81  | 19.81  |
|              | Oese2   | 54        | 90        | 6.78       | 0.43       | 6.8     | 16        | 18    | 0.71  | 17.38             | 17.38  | 17.38  |
|              | Cseg1   | 90        | 117       | 4.48       | 0.32       | 4.5     | 14        | 16    | 1.07  | 13.00             | 4.82   | 13.00  |
|              | Cseg2   | 117       | 149       | 6.61       | 0.58       | 6.6     | 11        | 13    | 0.7   | 14.78             |        | 14.78  |
|              | Cseg3   | 149       | 217       | 3.46       | 0.28       | 3.5     | 12        | 14    | 0.72  | 17.14             |        | 12.85  |
| Bestpitch    | Oi      | 0         | 10        | 14.42      | 0.63       | 14.4    | 23        | 27    | 0.36  | 5.18              | 5.18   | 5.18   |
|              | Oise    | 10        | 24        | 14.13      | 0.63       | 14.1    | 22        | 26    | 0.41  | 8.09              | 8.09   | 8.09   |
|              | Oese1   | 24        | 33        | 6.47       | 0.4        | 6.5     | 16        | 19    | 0.63  | 3.69              | 3.69   | 3.69   |
|              | Oese2   | 33        | 41        | 7.27       | 0.46       | 7.3     | 16        | 18    | 0.66  | 3.85              | 3.85   | 3.85   |
|              | Oese3   | 41        | 60        | 7.55       | 0.51       | 7.6     | 15        | 17    | 0.69  | 9.96              | 9.96   | 9.96   |
|              | Oese4   | 60        | 87        | 6.42       | 0.34       | 6.4     | 19        | 22    | 0.78  | 13.48             | 13.48  | 13.48  |
|              | Oese5   | 87        | 156       | 7.52       | 0.39       | 7.5     | 19        | 22    | 0.69  | 35.71             | 6.73   | 35.71  |
|              | Cseg1   | 156       | 183       | 6.02       | 0.37       | 6       | 16        | 19    | 0.7   | 11.34             |        | 11.34  |
| Pawcatuck    | Oe      | 0         | 17        | 20.04      | 1.31       | 20      | 15        | 18    | 0.36  | 12.24             | 12.24  | 12.24  |
|              | Oese1   | 17        | 33        | 10.7       | 0.71       | 10.7    | 15        | 18    | 0.65  | 11.13             | 11.13  | 11.13  |
|              | Oese2   | 33        | 52        | 10.47      | 0.59       | 10.5    | 18        | 21    | 0.5   | 9.98              | 9.98   | 9.98   |
|              | Oese3   | 52        | 70        | 7.22       | 0.41       | 7.2     | 18        | 21    | 0.63  | 8.16              | 8.16   | 8.16   |
|              | Oese4   | 70        | 89        | 7.67       | 0.4        | 7.7     | 19        | 22    | 0.67  | 9.80              | 9.80   | 9.80   |
|              | 2Cseg   | 89        | 130       | 1.05       | 0.03       | 1.1     | 35        | 41    | 1.65  | 7.44              | 2.00   | 7.44   |
| Transquaking | Oa      | 0         | 8         | 18.72      | 1.46       | 18      | 13        | 15    | 0.31  | 4.46              | 4.46   | 4.46   |
|              | Oe      | 8         | 19        | 29.89      | 1.59       | 29.9    | 19        | 22    | 0.03  | 0.99              | 0.99   | 0.99   |
|              | Oese    | 19        | 34        | 18.52      | 1.03       | 18.5    | 18        | 21    | 0.6   | 16.65             | 16.65  | 16.65  |
|              | Cseg    | 34        | 50        | 13.47      | 0.67       | 13.5    | 20        | 23    | 0.68  | 14.69             | 14.69  | 14.69  |
|              | O'ese1  | 50        | 113       | 18.53      | 0.99       | 18.5    | 19        | 22    | 0.57  | 66.43             | 52.73  | 66.43  |
|              | O'ese2  | 113       | 134       | 17.04      | 0.7        | 17      | 24        | 28    | 0.57  | 20.35             |        | 20.35  |
|              | C'seg   | 134       | 160       | 12.81      | 0.57       | 12.8    | 22        | 26    | 0.68  | 22.63             |        | 22.63  |
|              | 2Oaseb  | 160       | 176       | 6.97       | 0.25       | 7       | 28        | 33    | 0.6   | 6.72              |        | 6.72   |
|              | 2Aseb   | 176       | 182       | 1.34       | 0.04       | 1.3     | 34        | 39    | 0.88  | 0.69              |        | 0.69   |
| Boxiron tax. | Oise    | 0         | 13        | 16.07      | 1.04       | 16.1    | 15        | 18    | 0.26  | 5.44              | 5.44   | 5.44   |
|              | Oese1   | 13        | 23        | 11.93      | 0.79       | 11.9    | 15        | 18    | 0.48  | 5.71              | 5.71   | 5.71   |
|              | Cg      | 23        | 40        | 10.79      | 0.71       | 10.8    | 15        | 18    | 0.19  | 3.49              | 3.49   | 3.49   |
|              | Cseg1   | 40        | 69        | 7.45       | 0.54       | 7.4     | 14        | 16    | 0.45  | 9.66              | 9.66   | 9.66   |
|              | Cseg2   | 69        | 86        | 4.75       | 0.41       | 4.8     | 12        | 14    | 0.66  | 5.39              | 5.39   | 5.39   |
|              | Cseg3   | 86        | 116       | 11.12      | 0.58       | 11.1    | 19        | 22    | 0.32  | 10.66             | 4.97   | 10.66  |
|              | Cseg4   | 116       | 132       | 10.61      | 0.55       | 10.6    | 19        | 22    | 0.29  | 4.92              |        | 4.92   |
|              | O'ese1  | 132       | 158       | 12.95      | 0.68       | 12.9    | 19        | 22    | 0.31  | 10.40             |        | 10.40  |
|              | O'ese2  | 158       | 178       | 20.35      | 1.12       | 20.4    | 18        | 21    | 0.25  | 10.20             |        | 10.20  |
|              | Oase1   | 178       | 198       | 23.23      | 1.27       | 23.2    | 18        | 21    | 0.21  | 9.74              |        | 9.74   |
|              | Oase2   | 198       | 211       | 16.26      | 0.85       | 16.3    | 19        | 22    | 0.22  | 4.66              |        | 0.72   |



|                    |        |     |     |       |      |      |    |    |      |       |       |       |
|--------------------|--------|-----|-----|-------|------|------|----|----|------|-------|-------|-------|
|                    | C'seg1 | 211 | 232 | 10.66 | 0.56 | 10.6 | 19 | 22 | 0.34 | 7.57  |       |       |
|                    | C'seg2 | 232 | 247 | 6.77  | 0.53 | 6.7  | 13 | 15 | 0.42 | 4.22  |       |       |
| Bestpitch          | Oi1    | 0   | 10  | 26.31 | 1.36 | 26.3 | 19 | 23 | 0.13 | 3.42  | 3.42  | 3.42  |
|                    | Oi2    | 10  | 20  | 24.9  | 1.21 | 24.9 | 21 | 24 | 0.12 | 2.99  | 2.99  | 2.99  |
|                    | Oese   | 20  | 31  | 13.64 | 0.76 | 13.6 | 18 | 21 | 0.22 | 3.29  | 3.29  | 3.29  |
|                    | Cseg1  | 31  | 44  | 8.27  | 0.52 | 8.3  | 16 | 19 | 0.26 | 2.81  | 2.81  | 2.81  |
|                    | Cseg2  | 44  | 97  | 7.49  | 0.43 | 7.5  | 17 | 20 | 0.55 | 21.86 | 21.86 | 21.86 |
|                    | O'ese1 | 97  | 113 | 11.86 | 0.63 | 11.9 | 19 | 22 | 0.34 | 6.47  | 1.21  | 6.47  |
|                    | O'ese2 | 113 | 156 | 11.78 | 0.6  | 11.8 | 20 | 23 | 0.28 | 14.21 |       | 14.21 |
|                    | 2Cseg1 | 156 | 176 | 9.24  | 0.55 | 9.2  | 17 | 20 | 0.4  | 7.36  |       | 7.36  |
|                    | 2Cseg2 | 176 | 197 | 7.08  | 0.48 | 7.1  | 15 | 17 | 0.46 | 6.86  |       | 6.86  |
|                    | 2Cseg3 | 197 | 212 | 8.35  | 0.55 | 8.4  | 15 | 18 | 0.35 | 4.41  |       | 0.88  |
|                    | 2Cseg4 | 212 | 226 | 5.79  | 0.41 | 5.8  | 14 | 16 | 0.44 | 3.57  |       |       |
| Broadkill          | Oise   | 0   | 17  | 21.7  | 1.11 | 21.7 | 20 | 23 | 0.19 | 7.01  | 7.01  | 7.01  |
|                    | Cg     | 17  | 29  | 8.26  | 0.45 | 8.3  | 18 | 21 | 0.31 | 3.09  | 3.09  | 3.09  |
|                    | Cseg1  | 29  | 44  | 1.34  | 0.11 | 1.3  | 12 | 14 | 1.38 | 2.69  | 2.69  | 2.69  |
|                    | Cseg2  | 44  | 55  | 11.21 | 0.68 | 11.2 | 16 | 19 | 0.46 | 5.67  | 5.67  | 5.67  |
|                    | Cseg3  | 55  | 66  | 8.97  | 0.51 | 9    | 18 | 21 | 0.35 | 3.47  | 3.47  | 3.47  |
|                    | Cseg4  | 66  | 76  | 6.24  | 0.48 | 6.2  | 13 | 15 | 0.49 | 3.04  | 3.04  | 3.04  |
|                    | Cseg5  | 76  | 106 | 7.17  | 0.49 | 7.2  | 15 | 17 | 0.49 | 10.58 | 8.47  | 10.58 |
|                    | Cseg6  | 106 | 135 | 8.35  | 0.51 | 8.4  | 16 | 19 | 0.42 | 10.23 |       | 10.23 |
|                    | Cseg7  | 135 | 160 | 8.38  | 0.55 | 8.4  | 15 | 18 | 0.36 | 7.56  |       | 7.56  |
|                    | Cseg8  | 160 | 176 | 7.92  | 0.46 | 7.9  | 17 | 20 | 0.48 | 6.07  |       | 6.07  |
|                    | Oase   | 176 | 209 | 12.67 | 0.64 | 12.7 | 20 | 23 | 0.3  | 12.57 |       | 9.14  |
|                    | C'seg  | 209 | 220 | 8.57  | 0.54 | 8.6  | 16 | 19 | 0.48 | 4.54  |       |       |
| Appoquinimink tax. | Aseg   | 0   | 17  | 4.75  | 0.28 | 4.8  | 17 | 20 | 0.83 | 6.77  | 6.77  | 6.77  |
|                    | Cseg1  | 17  | 25  | 5.24  | 0.31 | 5.2  | 17 | 20 | 0.57 | 2.37  | 2.37  | 2.37  |
|                    | Cseg2  | 25  | 41  | 6.3   | 0.35 | 6.3  | 18 | 21 | 0.4  | 4.03  | 4.03  | 4.03  |
|                    | Acseg  | 41  | 70  | 3.56  | 0.22 | 3.6  | 16 | 19 | 0.79 | 8.25  | 8.25  | 8.25  |
|                    | Cseg3  | 70  | 96  | 4.66  | 0.28 | 4.7  | 17 | 19 | 0.49 | 5.99  | 5.99  | 5.99  |
|                    | Oese   | 96  | 126 | 8.46  | 0.39 | 8.5  | 22 | 25 | 0.57 | 14.54 | 1.94  | 14.54 |
|                    | Oase1  | 126 | 142 | 14    | 0.63 | 14   | 22 | 26 | 0.32 | 7.17  |       | 7.17  |
|                    | Oase2  | 142 | 183 | 13.84 | 0.7  | 13.8 | 20 | 23 | 0.34 | 19.24 |       | 19.24 |
|                    | Oase3  | 183 | 213 | 10.95 | 0.62 | 11   | 18 | 21 | 0.29 | 9.57  |       | 5.42  |
|                    | Oase4  | 213 | 228 | 13.81 | 0.75 | 13.8 | 18 | 21 | 0.31 | 6.42  |       |       |
| Boxiron tax.       | Oise   | 0   | 24  | 10.09 | 0.55 | 10.1 | 18 | 21 | 0.4  | 9.70  | 9.70  | 9.70  |
|                    | Cseg1  | 24  | 41  | 7.92  | 0.44 | 7.9  | 18 | 21 | 0.33 | 4.43  | 4.43  | 4.43  |
|                    | Cseg2  | 41  | 68  | 7.43  | 0.39 | 7.4  | 19 | 22 | 0.34 | 6.79  | 6.79  | 6.79  |
|                    | Cseg3  | 68  | 80  | 4.15  | 0.26 | 4.2  | 16 | 19 | 0.72 | 3.63  | 3.63  | 3.63  |
|                    | Cseg4  | 80  | 109 | 2.85  | 0.16 | 2.9  | 18 | 21 | 0.59 | 4.96  | 3.42  | 4.96  |
|                    | 2Cseg5 | 109 | 148 | 0.11  | 0.01 | 0.1  | 11 | 13 | 1.45 | 0.57  |       | 0.57  |
|                    | 2Cseg6 | 148 | 208 | 0.01  |      | 0.01 |    |    | 1.45 | 0.09  |       | 0.08  |
|                    | 2Cseg7 | 208 | 223 | 0.04  | 0.02 | 0.01 | 2  | 2  | 1.48 | 0.02  |       |       |
| Boxiron tax.       | Oise   | 0   | 13  | 13.87 | 0.77 | 13.9 | 18 | 21 | 0.26 | 4.70  | 4.70  | 4.70  |
|                    | Oese   | 13  | 21  | 10.74 | 0.56 | 10.7 | 19 | 22 | 0.28 | 2.40  | 2.40  | 2.40  |
|                    | Cseg1  | 21  | 38  | 9.73  | 0.54 | 9.7  | 18 | 21 | 0.28 | 4.62  | 4.62  | 4.62  |

|              |        |     |     |       |      |      |    |    |      |       |       |       |
|--------------|--------|-----|-----|-------|------|------|----|----|------|-------|-------|-------|
|              | Cseg2  | 38  | 60  | 8.47  | 0.45 | 8.5  | 19 | 22 | 0.31 | 5.80  | 5.80  | 5.80  |
|              | Cseg3  | 60  | 95  | 7.93  | 0.54 | 7.9  | 15 | 17 | 0.38 | 10.51 | 10.51 | 10.51 |
|              | Cseg4  | 95  | 133 | 5.53  | 0.38 | 5.5  | 15 | 17 | 0.48 | 10.03 | 1.32  | 10.03 |
|              | Cseg5  | 133 | 200 | 2.25  | 0.17 | 2.3  | 13 | 15 | 0.73 | 11.25 |       | 11.25 |
|              | ACsegb | 200 | 232 | 4.03  | 0.29 | 4    | 14 | 16 | 0.59 | 7.55  |       |       |
| Bestpitch    | Oise   | 0   | 15  | 17.62 | 0.91 | 17.6 | 19 | 23 | 0.19 | 5.02  | 5.02  | 5.02  |
|              | Oese1  | 15  | 34  | 14.8  | 0.69 | 14.8 | 21 | 25 | 0.19 | 5.34  | 5.34  | 5.34  |
|              | Oese2  | 34  | 74  | 14.5  | 0.75 | 14.5 | 19 | 23 | 0.32 | 18.56 | 18.56 | 18.56 |
|              | Oase   | 74  | 103 | 11.33 | 0.54 | 11.3 | 21 | 24 | 0.23 | 7.54  | 6.76  | 7.54  |
|              | Cseg1  | 103 | 149 | 6.25  | 0.35 | 6.3  | 18 | 21 | 0.49 | 14.20 |       | 14.20 |
|              | Cseg2  | 149 | 187 | 7.98  | 0.4  | 8    | 20 | 23 | 0.28 | 8.51  |       | 8.51  |
|              | Cseg3  | 187 | 224 | 6.39  | 0.35 | 6.4  | 18 | 21 | 0.73 | 17.29 |       | 6.07  |
| Bestpitch    | Oi     | 0   | 15  | 13.61 | 0.83 | 13.6 | 16 | 19 | 0.23 | 4.69  | 4.69  | 4.69  |
|              | Oe     | 15  | 36  | 17.81 | 0.99 | 17.8 | 18 | 21 | 0.19 | 7.10  | 7.10  | 7.10  |
|              | Oese   | 36  | 53  | 8.62  | 0.47 | 8.6  | 18 | 21 | 0.3  | 4.39  | 4.39  | 4.39  |
|              | Cseg1  | 53  | 81  | 5.58  | 0.36 | 5.6  | 16 | 18 | 0.38 | 5.96  | 5.96  | 5.96  |
|              | Cseg2  | 81  | 94  | 4.96  | 0.31 | 5    | 16 | 19 | 0.5  | 3.25  | 3.25  | 3.25  |
|              | Cseg3  | 94  | 117 | 3.08  | 0.22 | 3.1  | 14 | 16 | 0.6  | 4.28  | 1.12  | 4.28  |
|              | Cseg4  | 117 | 190 | 1.78  | 0.15 | 1.8  | 12 | 14 | 0.86 | 11.30 |       | 12.85 |
|              | Cseg5  | 190 | 218 | 1.84  | 0.13 | 1.8  | 14 | 17 | 0.86 | 4.33  |       | 1.55  |
| Bestpitch    | Oise   | 0   | 18  | 15.89 | 0.91 | 15.9 | 17 | 20 | 0.25 | 7.16  | 7.16  | 7.16  |
|              | Oese   | 18  | 31  | 15.69 | 0.74 | 15.7 | 21 | 25 | 0.19 | 3.88  | 3.88  | 3.88  |
|              | Oase   | 31  | 63  | 11.58 | 0.56 | 11.6 | 21 | 24 | 0.29 | 10.76 | 10.76 | 10.76 |
|              | Cseg1  | 63  | 84  | 6.48  | 0.37 | 6.5  | 18 | 20 | 0.32 | 4.37  | 4.37  | 4.37  |
|              | Cseg2  | 84  | 108 | 3.34  | 0.23 | 3.3  | 15 | 17 | 0.64 | 5.07  | 3.38  | 5.07  |
|              | Cseg3  | 108 | 124 | 4.88  | 0.3  | 4.9  | 16 | 19 | 0.31 | 2.43  |       | 2.43  |
|              | Cseg4  | 124 | 175 | 1.97  | 0.15 | 2    | 13 | 15 | 0.81 | 8.26  |       | 12.31 |
|              | 2Cg    | 175 | 219 | 0.26  | 0.02 | 0.3  | 13 | 15 | 1.27 | 1.68  |       | 0.95  |
| Boxiron tax. | Oise   | 0   | 26  | 11.78 | 0.73 | 11.8 | 16 | 19 | 0.3  | 9.20  | 9.20  | 9.20  |
|              | Cseg1  | 26  | 45  | 8.48  | 0.56 | 8.5  | 15 | 18 | 0.3  | 4.85  | 4.85  | 4.85  |
|              | Cseg2  | 45  | 87  | 6.22  | 0.48 | 6.2  | 13 | 15 | 0.39 | 10.16 | 10.16 | 10.16 |
|              | Cseg3  | 87  | 101 | 8.14  | 0.49 | 8.1  | 17 | 19 | 0.37 | 4.20  | 3.90  | 4.20  |
|              | Cseg4  | 101 | 120 | 8.94  | 0.49 | 8.9  | 18 | 21 | 0.3  | 5.07  |       | 5.07  |
|              | Cseg5  | 120 | 142 | 8.51  | 0.53 | 8.5  | 16 | 19 | 0.33 | 6.17  |       | 6.17  |
|              | Cseg6  | 142 | 165 | 3.7   | 0.31 | 3.7  | 12 | 14 | 0.3  | 2.55  |       | 2.55  |
|              | Cg     | 165 | 210 | 2.42  | 0.24 | 2.4  | 10 | 12 | 0.3  | 3.24  |       | 2.52  |
| Boxiron tax. | Oise   | 0   | 24  | 14.82 | 0.91 | 14.8 | 16 | 19 | 0.28 | 9.95  | 9.95  | 9.95  |
|              | Cseg1  | 24  | 48  | 7.78  | 0.51 | 7.8  | 15 | 18 | 0.4  | 7.49  | 7.49  | 7.49  |
|              | Cseg2  | 48  | 61  | 10.95 | 0.77 | 11   | 14 | 17 | 0.27 | 3.86  | 3.86  | 3.86  |
|              | Cseg3  | 61  | 77  | 11.1  | 0.85 | 11.1 | 13 | 15 | 0.36 | 6.39  | 6.39  | 6.39  |
|              | Cseg4  | 77  | 96  | 10.82 | 0.66 | 10.8 | 16 | 19 | 0.32 | 6.57  | 6.57  | 6.57  |
|              | Oase   | 96  | 106 | 16.7  | 0.91 | 16.7 | 18 | 21 | 0.26 | 4.34  | 1.74  | 4.34  |
|              | 2Aseb  | 106 | 123 | 3.23  | 0.15 | 3.2  | 22 | 25 | 0.85 | 4.62  |       | 4.62  |
|              | 2Eb    | 123 | 139 | 0.39  | 0.02 | 0.4  | 20 | 23 | 1.66 | 1.06  |       | 1.06  |
|              | 2Bhsb  | 139 | 176 | 0.49  | 0.01 | 0.5  | 49 | 57 | 1.7  | 3.15  |       | 3.15  |
| Boxiron tax. | Oise   | 0   | 20  | 14.47 | 0.83 | 14.5 | 17 | 20 | 0.22 | 6.38  | 6.38  | 6.38  |
|              | Cseg1  | 20  | 46  | 9.39  | 0.62 | 9.4  | 15 | 18 | 0.29 | 7.09  | 7.09  | 7.09  |

|                 |        |     |     |       |       |      |    |    |      |       |       |       |
|-----------------|--------|-----|-----|-------|-------|------|----|----|------|-------|-------|-------|
|                 | Cseg2  | 46  | 61  | 9.87  | 0.63  | 9.9  | 16 | 18 | 0.27 | 4.01  | 4.01  | 4.01  |
|                 | Cseg3  | 61  | 105 | 5.33  | 0.51  | 5.3  | 10 | 12 | 0.4  | 9.33  | 8.27  | 9.33  |
|                 | Cseg4  | 105 | 119 | 6.05  | 0.51  | 6.1  | 12 | 14 | 0.35 | 2.99  |       | 2.99  |
|                 | Cseg5  | 119 | 156 | 3.97  | 0.36  | 4    | 11 | 13 | 0.54 | 7.99  |       | 7.99  |
|                 | Cseg6  | 156 | 184 | 8.72  | 0.56  | 8.7  | 16 | 18 | 0.4  | 9.74  |       | 9.74  |
|                 | Cseg7  | 184 | 218 | 6.92  | 0.5   | 6.9  | 14 | 16 | 0.4  | 9.38  |       | 4.42  |
| Transquaking    | Oise   | 0   | 18  | 23.7  | 1.18  | 23.7 | 20 | 23 | 0.15 | 6.40  | 6.40  | 6.40  |
|                 | Oese   | 18  | 43  | 14.22 | 0.86  | 14.2 | 17 | 19 | 0.22 | 7.81  | 7.81  | 7.81  |
|                 | Cseg   | 43  | 69  | 7.58  | 0.48  | 7.6  | 16 | 18 | 0.37 | 7.31  | 7.31  | 7.31  |
|                 | O'se1  | 69  | 110 | 12.84 | 0.75  | 12.8 | 17 | 20 | 0.28 | 14.69 | 11.11 | 14.69 |
|                 | O'se2  | 110 | 120 | 15.43 | 0.94  | 15.4 | 16 | 19 | 0.3  | 4.62  |       | 4.62  |
|                 | Oase   | 120 | 130 | 13.02 | 0.44  | 13   | 30 | 35 | 0.6  | 7.80  |       | 7.80  |
|                 | 2Asegb | 130 | 152 | 2.18  | 0.07  | 2.2  | 31 | 36 | 6.78 | 6.78  |       | 6.78  |
|                 | 2Bhseb | 152 | 182 | 1.03  | 0.03  | 1    | 34 | 40 | 4.20 | 4.20  |       | 4.20  |
| Saltpond        | Aseg   | 0   | 10  | 7.16  | 0.41  | 7.2  | 17 | 20 | 0.44 | 3.17  | 3.17  | 3.17  |
|                 | Cseg1  | 10  | 21  | 0.91  | 0.03  | 0.9  | 30 | 35 | 0.72 | 0.71  | 0.71  | 0.71  |
|                 | Cseg2  | 21  | 59  | 0.1   | 0.01  | 0.1  | 10 | 12 | 1.35 | 0.51  | 0.51  | 0.51  |
|                 | Acseg  | 59  | 67  | 0.05  | 0.03  | 0.1  | 2  | 2  | 1.45 | 0.12  | 0.12  | 0.12  |
|                 | C'seg  | 67  | 87  | 0.07  | 0.01  | 0.1  | 7  | 8  | 1.48 | 0.30  | 0.30  | 0.30  |
|                 | AC'seg | 87  | 99  | 0.07  | 0.01  | 0.1  | 7  | 8  | 1.43 | 0.17  | 0.17  | 0.17  |
|                 | C"seg  | 99  | 160 | 0.02  | 0.001 | 0.02 | 20 | 23 | 1.47 | 0.18  | 0.00  | 0.18  |
| Mispillion tax. | Oise   | 0   | 18  | 23.99 | 1.15  | 24   | 21 | 24 | 0.11 | 4.75  | 4.75  | 4.75  |
|                 | Oese1  | 18  | 37  | 17.28 | 0.88  | 17.3 | 20 | 23 | 0.18 | 5.92  | 5.92  | 5.92  |
|                 | Oese2  | 37  | 54  | 14.87 | 0.83  | 15   | 18 | 21 | 0.17 | 4.34  | 4.34  | 4.34  |
|                 | Oase1  | 54  | 76  | 24.1  | 1.17  | 24.1 | 21 | 24 | 0.12 | 6.36  | 6.36  | 6.36  |
|                 | Oase2  | 76  | 116 | 14.16 | 0.74  | 14.2 | 19 | 22 | 0.2  | 11.36 | 6.82  | 11.36 |
|                 | 2Agb   | 116 | 127 | 3.47  | 0.12  | 3.5  | 29 | 34 | 0.88 | 3.39  |       | 3.39  |
|                 | 2Egb   | 127 | 134 | 1.97  | 0.13  | 2    | 15 | 18 | 1.28 | 1.79  |       | 1.79  |
|                 | 2Bhsb  | 134 | 147 | 2.52  | 0.15  | 2.5  | 17 | 20 | 1.01 | 3.28  |       | 3.28  |
|                 | 2BCgb  | 147 | 190 | 0.33  | 0.01  | 0.3  | 33 | 38 | 1.8  | 2.32  |       | 2.32  |

## Supplementary Figures

**Figure S1.** Interpolations of water quality parameters measured in Barnegat Bay by NJ DEP for 2014-2021. The number of measurements collected are shown next to the sites. Imagery source: Esri World Imagery acquired in June 2020.

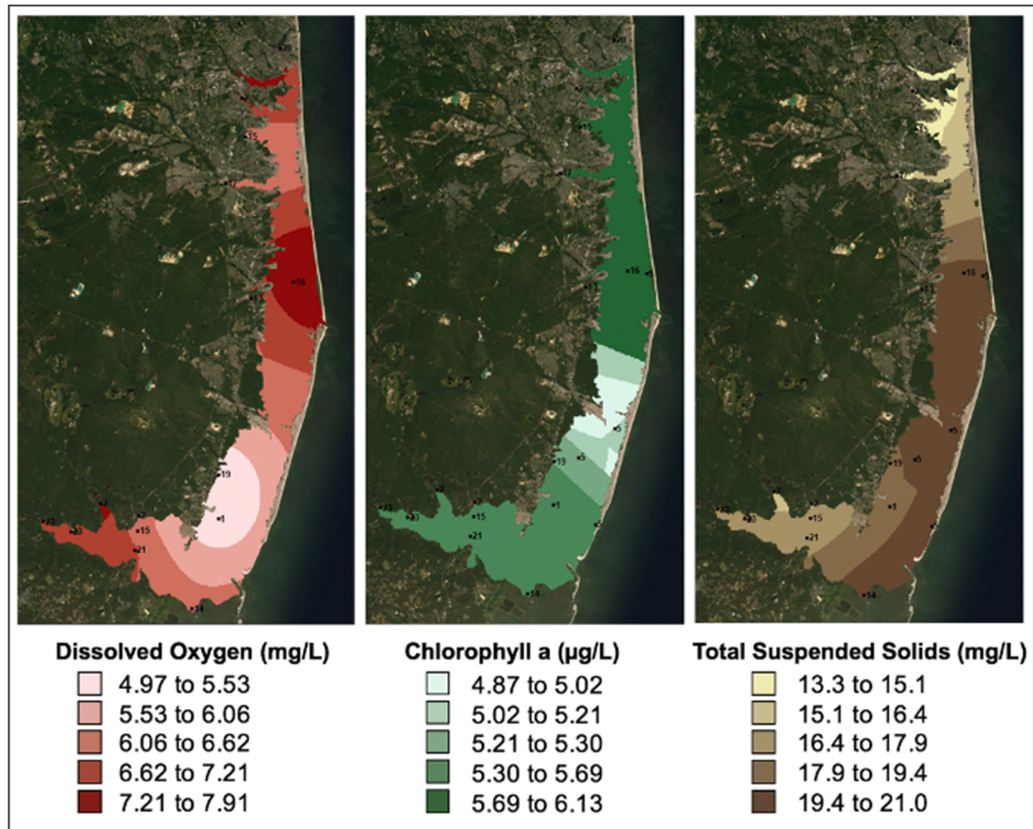

**Figure S2.** Suspended particulate matter N and C isotopes. Global Moran's I test in ArcGIS: SPM N: z-score = 1.45, *p*-value = 0.146; SPM C: z-score = 0.016, *p*-value = 0.987. Imagery source: Esri World Imagery acquired in June 2020.

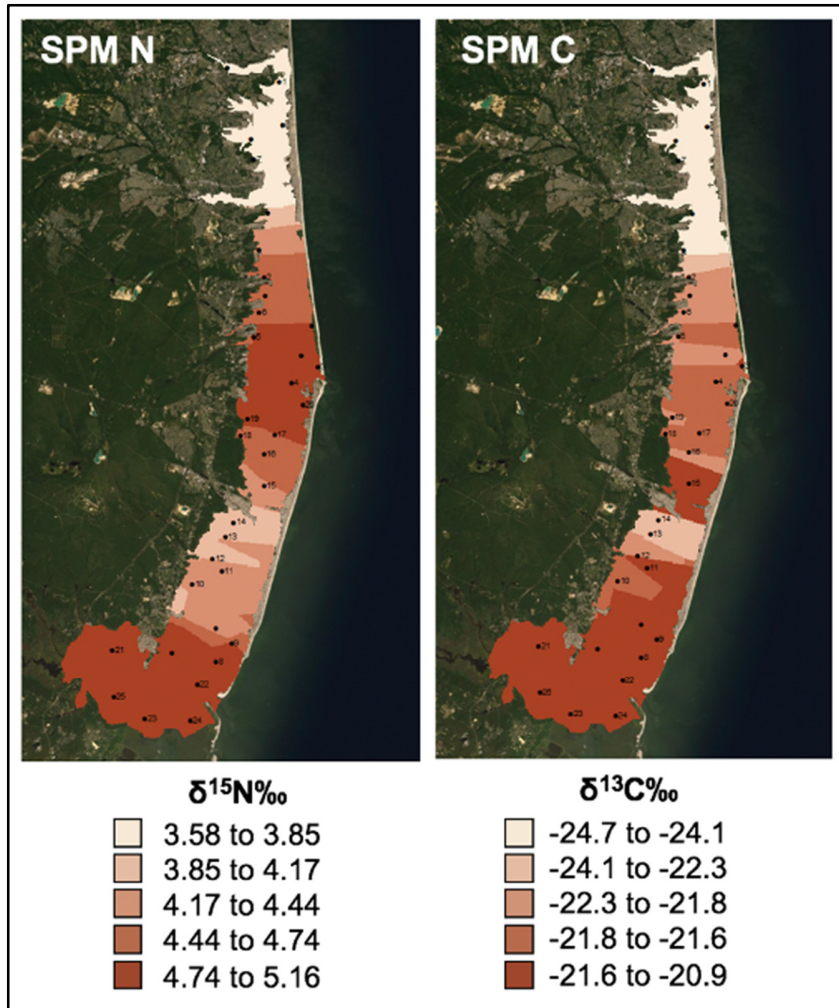

**Figure S3.** Change of the C/N ratio over core depth, representing changes of the relative C to N inputs over time. The map of C/N slope is the coefficient of a linear regression of the C/N ratio with respect to depth, and red indicates an increased ratio deeper in the core while blue indicates a decreased ratio downcore. Imagery source: Esri World Imagery acquired in June 2020.

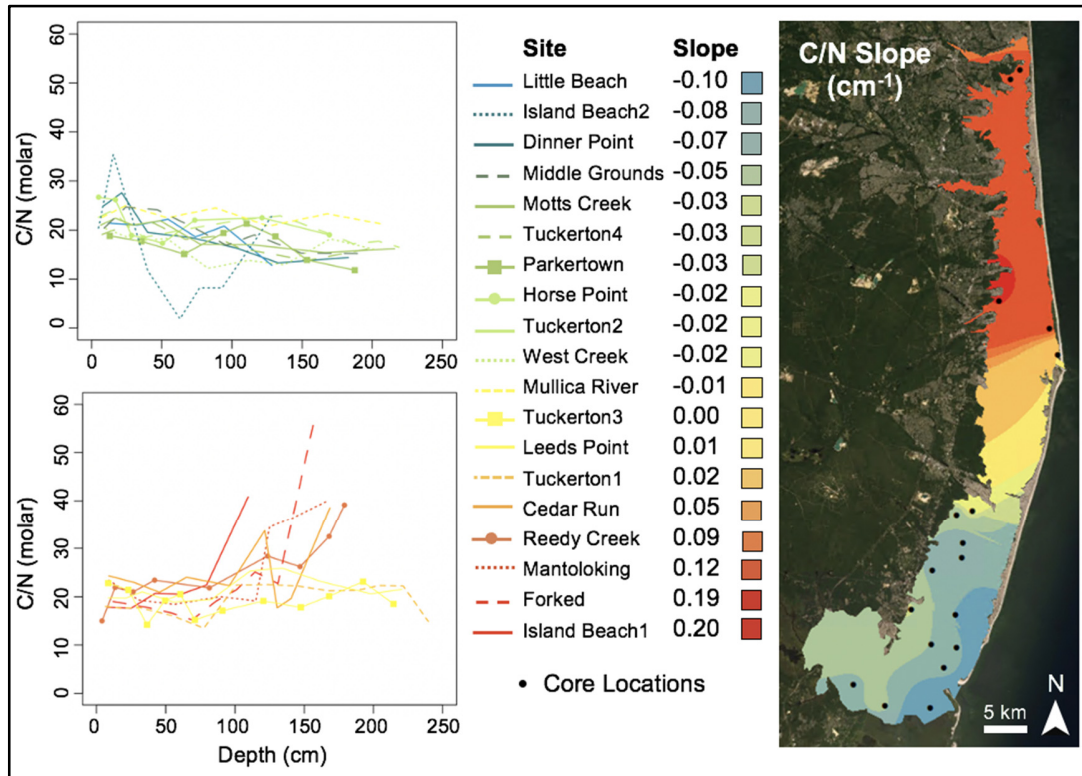

**Figure S4.** Measurements of total soil carbon and carbon to nitrogen ratio in the surface of marsh sediment cores (corresponding to 0-100cm depth). Imagery source: Esri World Imagery acquired in June 2020.

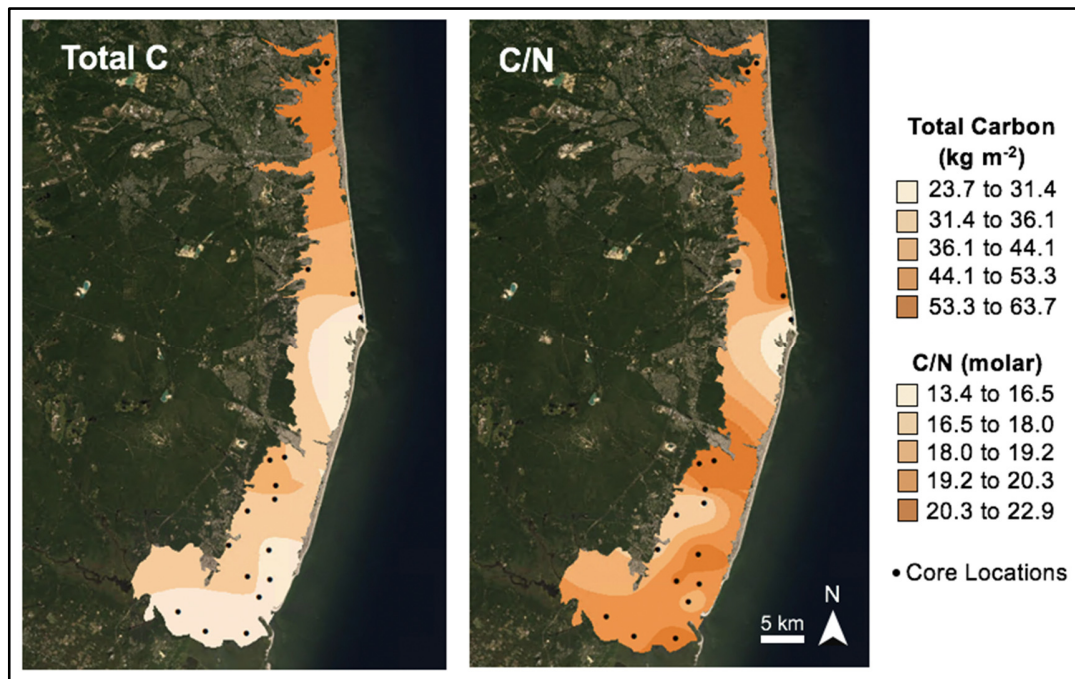

Supplement: s1 [file s1]
